# Supplementary material for: Bos indicus Carcasses Suspended by the Pelvic Bone Require a Shorter Aging Time to Meet Consumer Expectations Regarding Meat Quality
Source: MDPI journal article supplement (doi:10.3390/foods12050930), 2023-02-22
Supplement: s1 [file s1]

**Table S1.** Results of principal component analysis for the first five principal components (PC).

|                 | Eigenvalues | Variance percentage | Cumulative variance<br>percentage |
|-----------------|-------------|---------------------|-----------------------------------|
| Nellore bulls   |             |                     |                                   |
| PC1             | 3.89        | 25.90               | 25.90                             |
| PC2             | 3.37        | 22.44               | 48.34                             |
| PC3             | 2.36        | 15.76               | 64.10                             |
| PC4             | 1.53        | 10.22               | 74.32                             |
| PC5             | 1.38        | 9.17                | 83.49                             |
| Brangus heifers |             |                     |                                   |
| PC1             | 3.71        | 24.73               | 24.73                             |
| PC2             | 2.74        | 18.26               | 42.99                             |
| PC3             | 2.69        | 17.94               | 60.93                             |
| PC4             | 2.31        | 15.37               | 76.29                             |
| PC5             | 1.16        | 7.72                | 84.01                             |

**Table S2.** Coefficients of the eigenvectors (loadings) for the first four principal components for meat quality traits of Nellore bulls.

|                       | PC1        | PC2          | PC3          | PC4            |
|-----------------------|------------|--------------|--------------|----------------|
| Variable <sup>†</sup> | Tenderness | Meat color 1 | Meat color 2 | Cooking losses |
| TE                    | 0.64       | 0.49         | 0.33         | 0.05           |
| JU                    | 0.60       | 0.48         | 0.45         | 0.00           |
| FL                    | 0.60       | 0.52         | 0.43         | 0.00           |
| OA                    | 0.65       | 0.51         | 0.44         | 0.02           |
| L                     | 0.23       | -0.19        | 0.09         | 0.27           |
| a                     | 0.43       | -0.73        | 0.14         | 0.42           |
| b                     | 0.31       | 0.31         | -0.66        | 0.41           |
| CH                    | 0.47       | -0.65        | 0.01         | 0.48           |
| HUE                   | -0.07      | 0.74         | -0.58        | 0.00           |
| pH                    | 0.56       | -0.01        | -0.33        | 0.06           |
| SF                    | -0.71      | 0.50         | 0.24         | 0.07           |
| CL                    | -0.65      | 0.28         | 0.34         | 0.60           |
| DL                    | -0.27      | 0.58         | -0.31        | 0.37           |
| EL                    | -0.58      | 0.02         | 0.54         | 0.47           |
| PL                    | -0.33      | -0.24        | 0.45         | -0.40          |

<sup>†</sup> TE = sensory tenderness; JU = juiciness; FL = flavor; OA = overall acceptance; L = lightness; a = redness; b = yellowness; CH = chromaticity; HUE = real color; pH = meat pH; SF = shear force; CL = total cooking losses; DL = drip loss; EL = evaporation loss; PL = purge loss.

**Table S3.** Coefficients of the eigenvectors (loadings) for the first four principal components for meat quality traits of Brangus heifers.

|                       | PC1        | PC2          | PC3            | PC4          |
|-----------------------|------------|--------------|----------------|--------------|
| Variable <sup>†</sup> | Tenderness | Meat color 1 | Cooking losses | Meat color 2 |
| TE                    | 0.80       | 0.23         | 0.09           | -0.25        |
| JU                    | 0.78       | 0.27         | 0.12           | -0.37        |
| FL                    | 0.81       | 0.27         | 0.14           | -0.31        |
| OA                    | 0.83       | 0.29         | 0.12           | -0.33        |
| L                     | 0.08       | 0.53         | 0.42           | 0.62         |
| a                     | 0.41       | -0.68        | 0.43           | 0.32         |
| b                     | 0.42       | 0.11         | 0.25           | 0.85         |
| CH                    | 0.45       | -0.59        | 0.43           | 0.45         |
| HUE                   | 0.05       | 0.73         | -0.17          | 0.55         |
| pH                    | 0.19       | -0.69        | 0.06           | -0.15        |
| SF                    | -0.49      | 0.38         | 0.53           | -0.15        |
| CL                    | -0.32      | 0.18         | 0.82           | -0.23        |
| DL                    | -0.01      | -0.13        | 0.60           | -0.07        |
| EL                    | -0.39      | 0.28         | 0.68           | -0.24        |
| PL                    | -0.19      | -0.26        | 0.46           | -0.18        |

<sup>†</sup> TE = sensory tenderness; JU = juiciness; FL = flavor; OA = overall acceptance; L = lightness; a = redness; b = yellowness; CH = chromaticity; HUE = real color; pH = meat pH; SF = shear force; CL = total cooking losses; DL = drip loss; EL = evaporation loss; PL = purge loss.

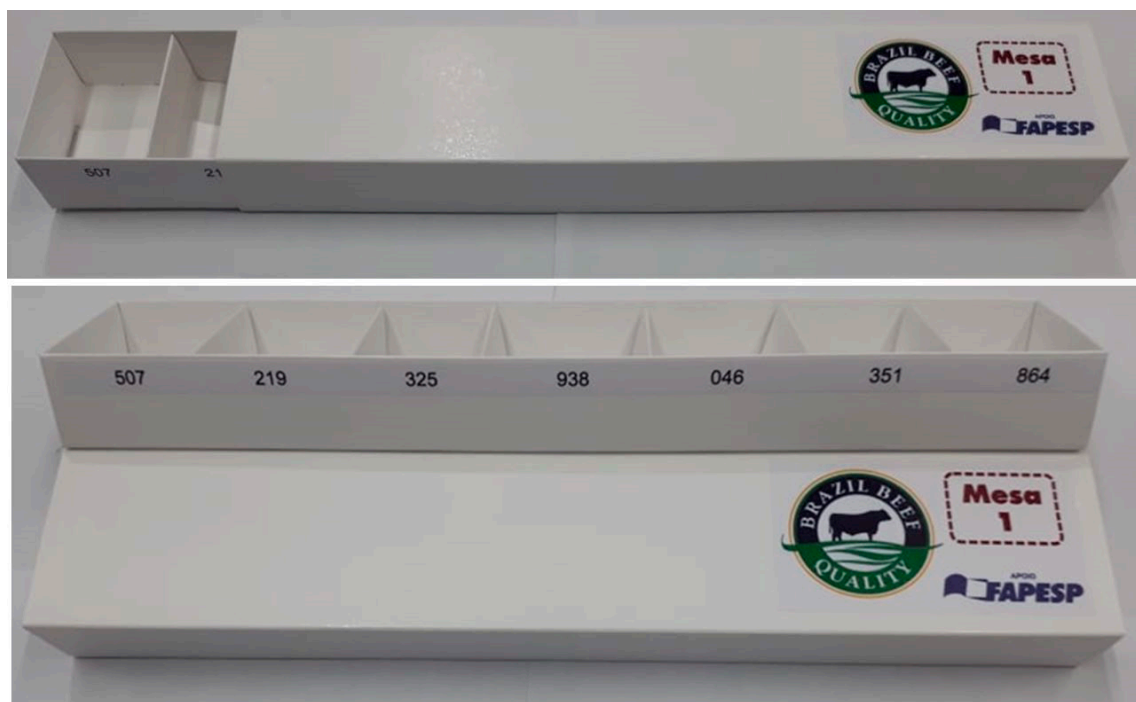

**Figure S1.** Small boxes (Brazil Beef Quality Ltd., Piracicaba, São Paulo, Brazil) with divisions used in sensory assays.
